# Supplementary material for: Mutations in dnaA and a cryptic interaction site increase drug resistance in Mycobacterium tuberculosis
Source: PubMed Central journal article supplement (PMC7738170; doi:10.1371/journal.ppat.1009063), 2020-11-30
Supplement: ppat.1009063.s001.pdf [file ppat.1009063.s001.pdf]

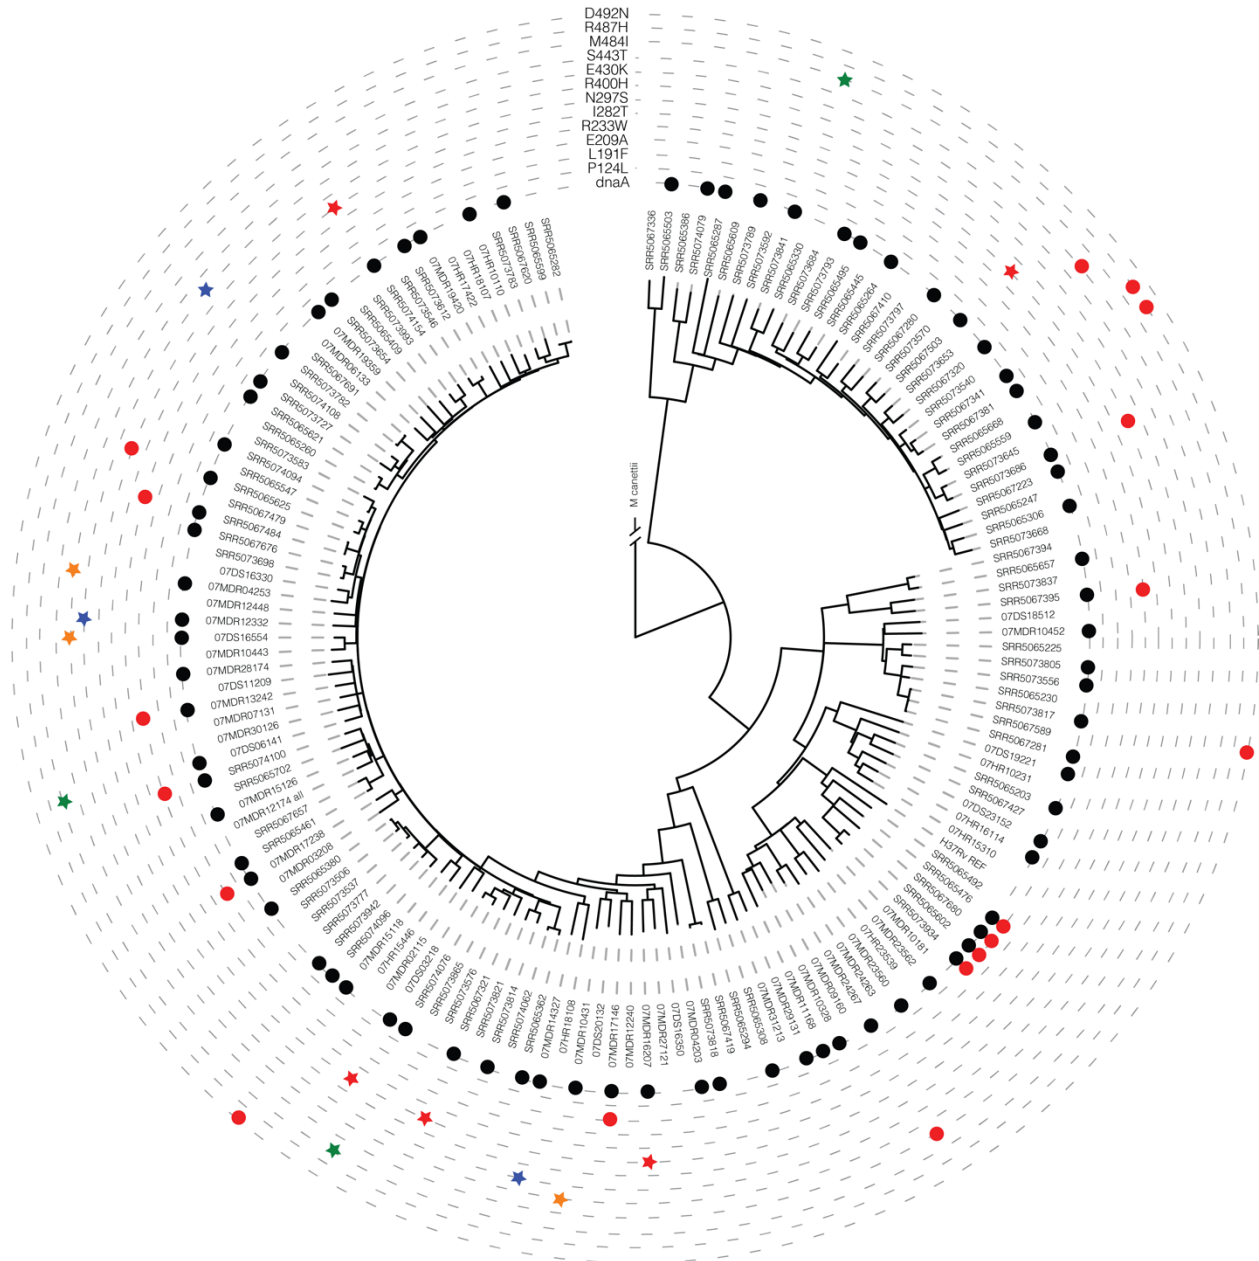

**Figure S1.** Whole-genome SNP phylogeny of all 78 strains containing non-synonymous *dnaA* mutations and their nearest, non-mutant phylogenetic neighbor. The tree is rooted using *Mycobacterium canettii* as an outgroup. The inner ring depicts strains with non-synonymous *dnaA* mutations while each successive ring shows isolates containing a mutation shared by multiple strains. Mutations that were constructed into H37Rv are shown as stars.
