# Supplementary material for: Mutations in dnaA and a cryptic interaction site increase drug resistance in Mycobacterium tuberculosis
Source: PubMed Central journal article supplement (PMC7738170; doi:10.1371/journal.ppat.1009063), 2020-11-30
Supplement: ppat.1009063.s003.pdf [file ppat.1009063.s003.pdf]

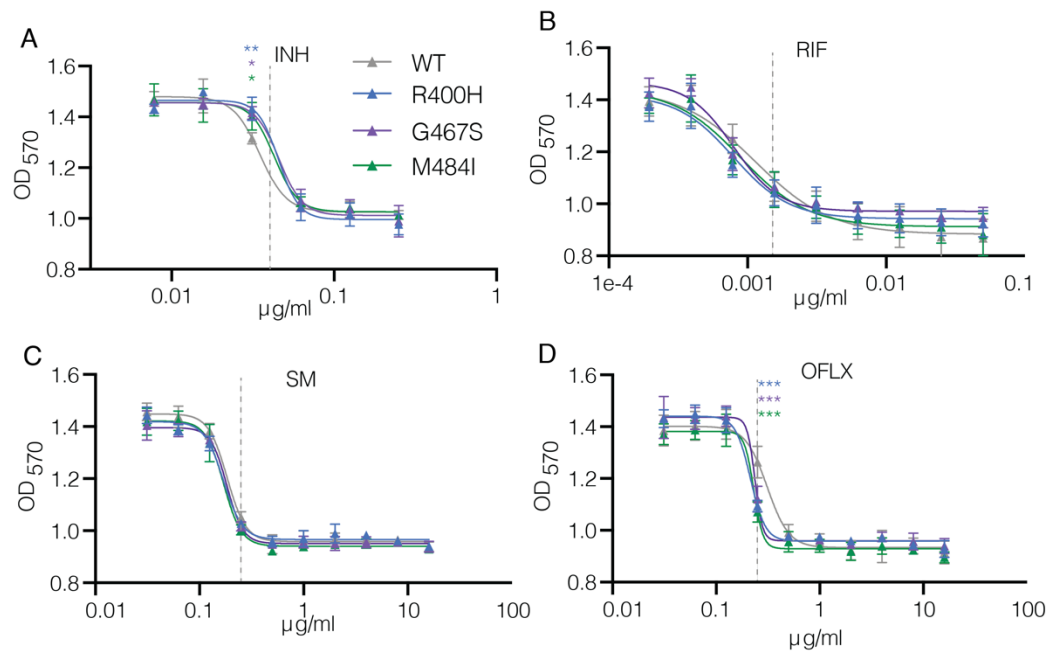

**Figure S3. Drug resistance screening with alamar-blue.** Alamar blue MIC measurements of indicated WT and *dnaA* mutant strains against INH (A), RIF (B), SM (C), and OFLX (D). Each point represents the mean and standard deviation among three independent clones for each genotype. The dashed line in each panel indicates the concentration used for competition assays in Figure 4.3. Differences among Alamar blue reduction (OD<sub>570</sub>) between WT and each mutant were tested using Dunnett's multiple comparison test after 2-way ANOVA. \*  $p < 0.05$ , \*\*  $p < 0.01$ , \*\*\*  $p < 0.001$ , \*\*\*\*  $p < 0.0001$ .
