# Supplementary material for: Mutations in dnaA and a cryptic interaction site increase drug resistance in Mycobacterium tuberculosis
Source: PubMed Central journal article supplement (PMC7738170; doi:10.1371/journal.ppat.1009063), 2020-11-30
Supplement: ppat.1009063.s004.pdf [file ppat.1009063.s004.pdf]

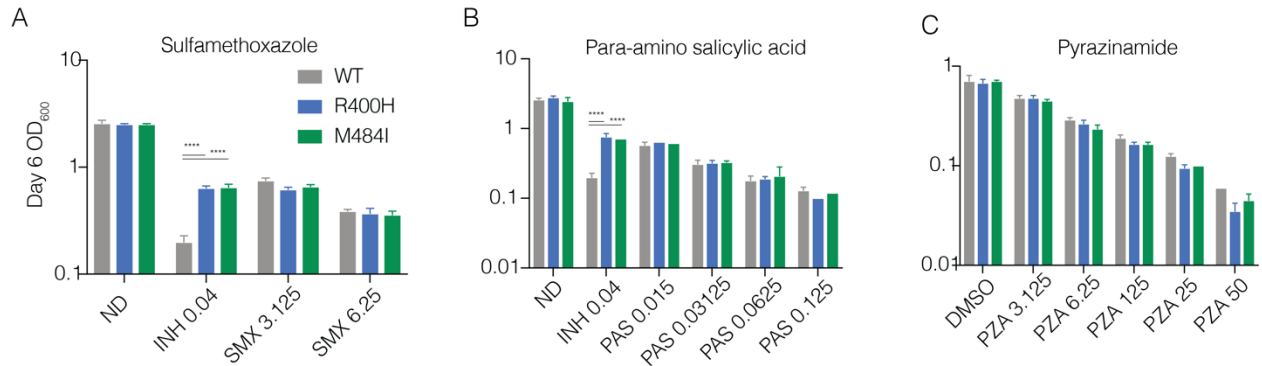

**Figure S4. Drug resistance screening by OD measured growth.** Growth of indicated strain in the presence of varying concentrations ( $\mu\text{g/ml}$ ) of sulfamethoxazole (A), para-amino salicylic acid (B), or pyrazinamide (C) as measured by OD<sub>600</sub> after 6 days of growth. INH 0.04 $\mu\text{g/ml}$  was also tested as a control. Bars represent the mean and standard deviation of two replicates. Difference in means were tested by Dunnett's multiple comparison test after two-way ANOVA. \*\*\*\*  $p < 0.0001$
