# Supplementary material for: Mutations in dnaA and a cryptic interaction site increase drug resistance in Mycobacterium tuberculosis
Source: PubMed Central journal article supplement (PMC7738170; doi:10.1371/journal.ppat.1009063), 2020-11-30
Supplement: ppat.1009063.s005.pdf [file ppat.1009063.s005.pdf]

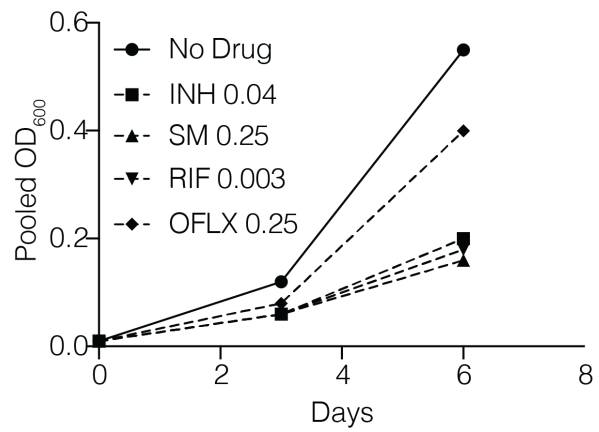

**Figure S5. Bulk growth measurement of the *dnaA* barcoded library.** Drug concentrations indicated are in  $\mu\text{g/ml}$ .
