# Supplementary material for: Mutations in dnaA and a cryptic interaction site increase drug resistance in Mycobacterium tuberculosis
Source: PubMed Central journal article supplement (PMC7738170; doi:10.1371/journal.ppat.1009063), 2020-11-30
Supplement: ppat.1009063.s007.pdf [file ppat.1009063.s007.pdf]

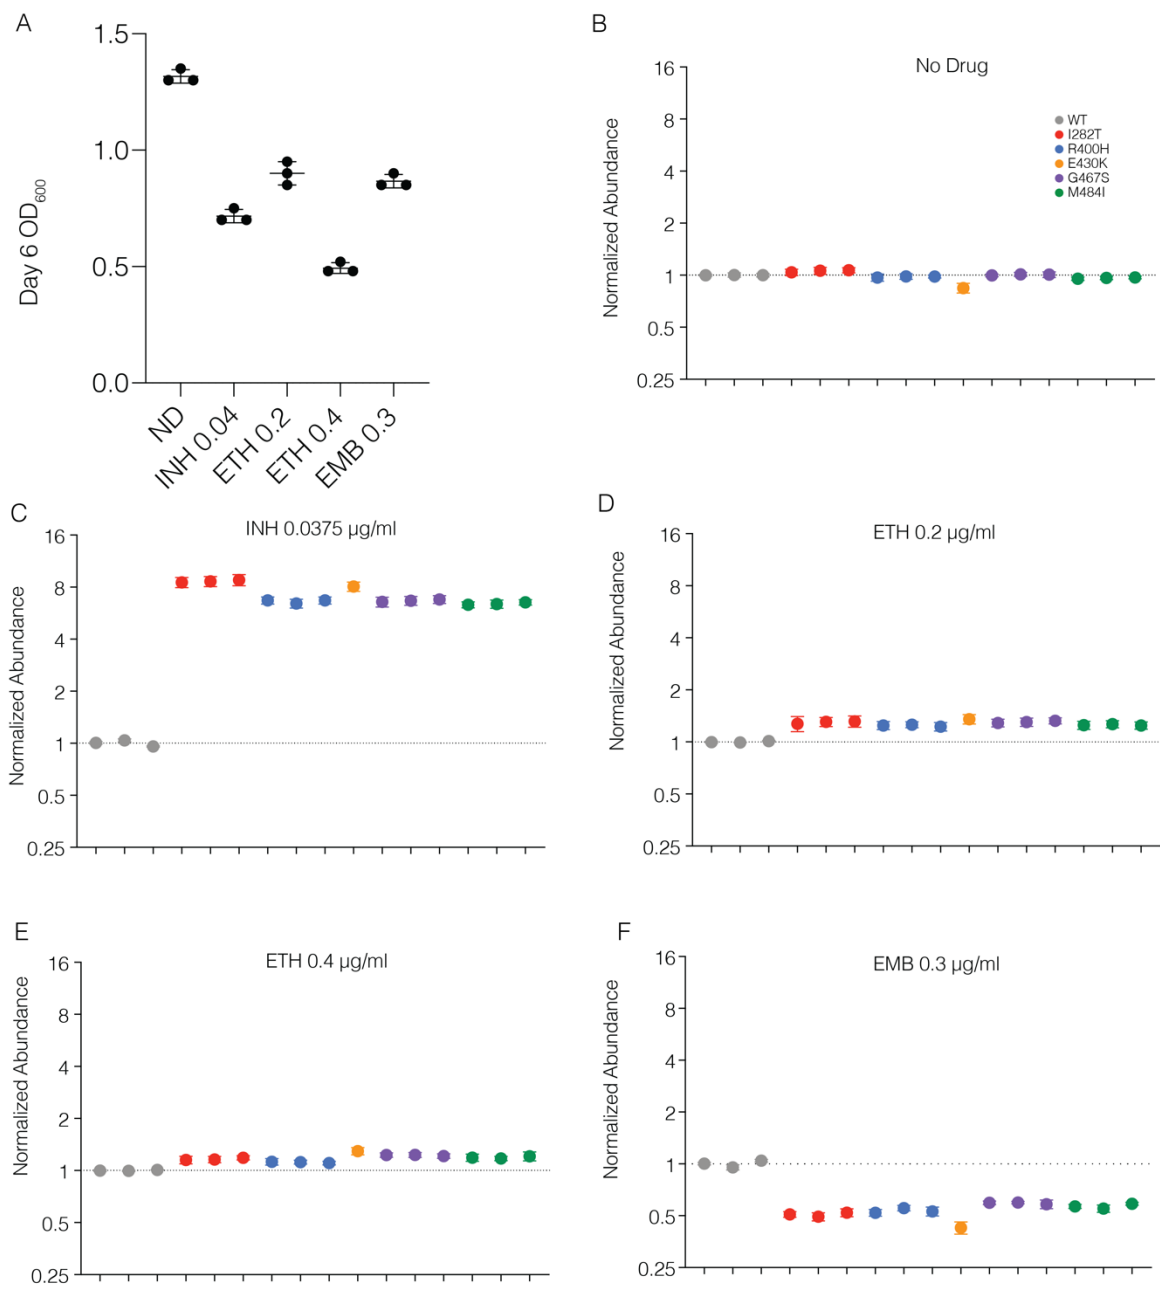

**Figure S7. Competition of *dnaA* mutants during treatment with partially inhibitory concentrations of ethionamide (ETH) and ethambutol (EMB).** INH is included as a positive control. (A) Final OD<sub>600</sub> of the bulk culture after 6 days of growth. Each dot represents an independent culture with the mean and standard deviation shown. (B-F) Relative abundance of each strain normalized to input library. Dots represent mean normalized abundance and bars show the standard deviation of three replicates.
