# Supplementary material for: Mutations in dnaA and a cryptic interaction site increase drug resistance in Mycobacterium tuberculosis
Source: PubMed Central journal article supplement (PMC7738170; doi:10.1371/journal.ppat.1009063), 2020-11-30
Supplement: ppat.1009063.s008.pdf [file ppat.1009063.s008.pdf]

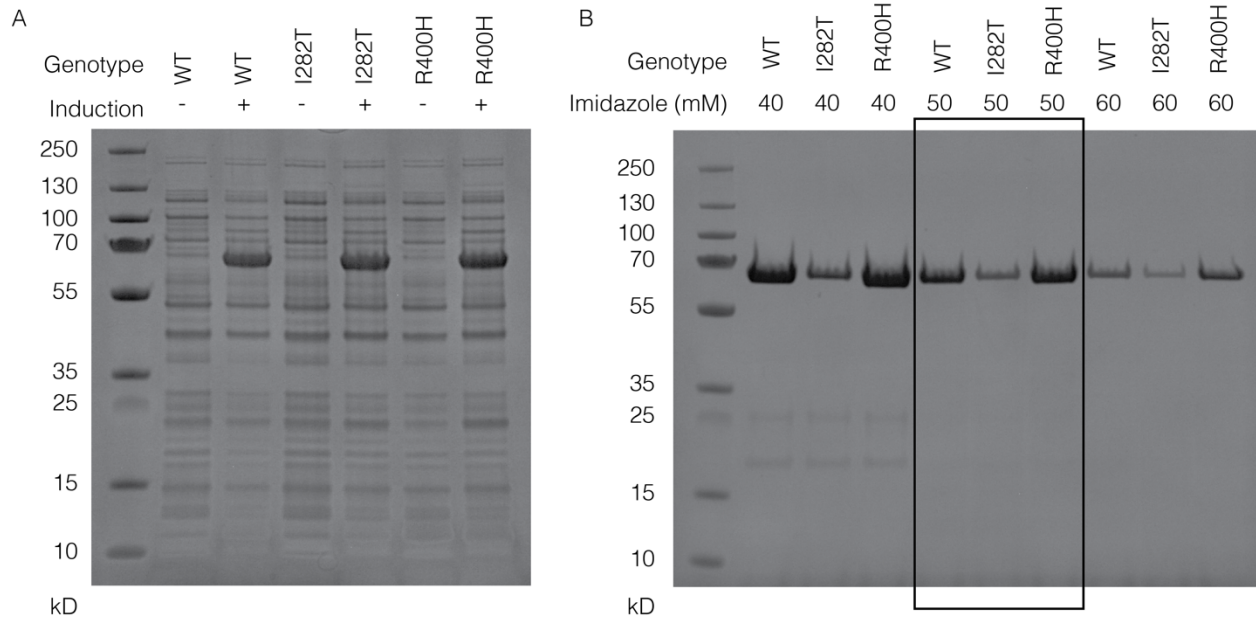

**Figure S8. Purification of recombinant 6xHIS-dnaA proteins.** (A) Induction of dnaA protein production in *E. coli* BL21 cells for purification. Cells were boiled with Laemmli buffer, run on a 4-12% BIS-TRIS gel and visualized using SimplyBlue SafeStain (ThermoFisher). (B) Purified dnaA protein elution fractions. The boxed protein purifications (50mM imidazole elution fraction) were used for experiments shown in Figure 4.
