# Supplementary material for: Mutations in dnaA and a cryptic interaction site increase drug resistance in Mycobacterium tuberculosis
Source: PubMed Central journal article supplement (PMC7738170; doi:10.1371/journal.ppat.1009063), 2020-11-30
Supplement: ppat.1009063.s009.pdf [file ppat.1009063.s009.pdf]

A

|                          |   |     |     |     |     |     |     |
|--------------------------|---|-----|-----|-----|-----|-----|-----|
| nM DnaA:                 | 0 | 100 | 100 | 100 | 140 | 140 | 140 |
| Specific competitor:     | - | -   | +   | -   | -   | +   | -   |
| Non-specific competitor: | - | -   | -   | +   | -   | -   | +   |

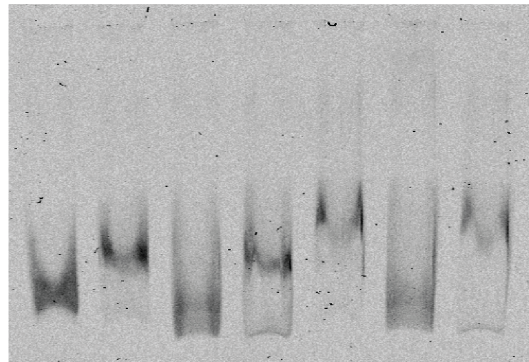

*oriC*

B

|                          |   |     |     |     |     |     |     |
|--------------------------|---|-----|-----|-----|-----|-----|-----|
| nM DnaA:                 | 0 | 100 | 100 | 100 | 140 | 140 | 140 |
| Specific competitor:     | - | -   | +   | -   | -   | +   | -   |
| Non-specific competitor: | - | -   | -   | +   | -   | -   | +   |

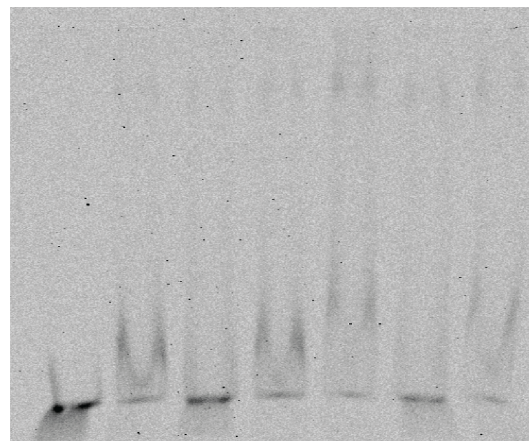

*Rv0010c-Rv0011c*

**Figure S9. Competitive controls for (A) *oriC* and (B) *Rv0010c-Rv0011c* binding.** Specific competitors for each probe were the same DNA sequence without a label. Non-specific competitor is an unlabeled fragment of *sigA* with the same sequence as the labeled control in Figure 4A and Figure 4C. All competitors were added at 20nM final concentration during the binding reaction.
