# Supplementary material for: Mutations in dnaA and a cryptic interaction site increase drug resistance in Mycobacterium tuberculosis
Source: PubMed Central journal article supplement (PMC7738170; doi:10.1371/journal.ppat.1009063), 2020-11-30
Supplement: ppat.1009063.s012.pdf [file ppat.1009063.s012.pdf]

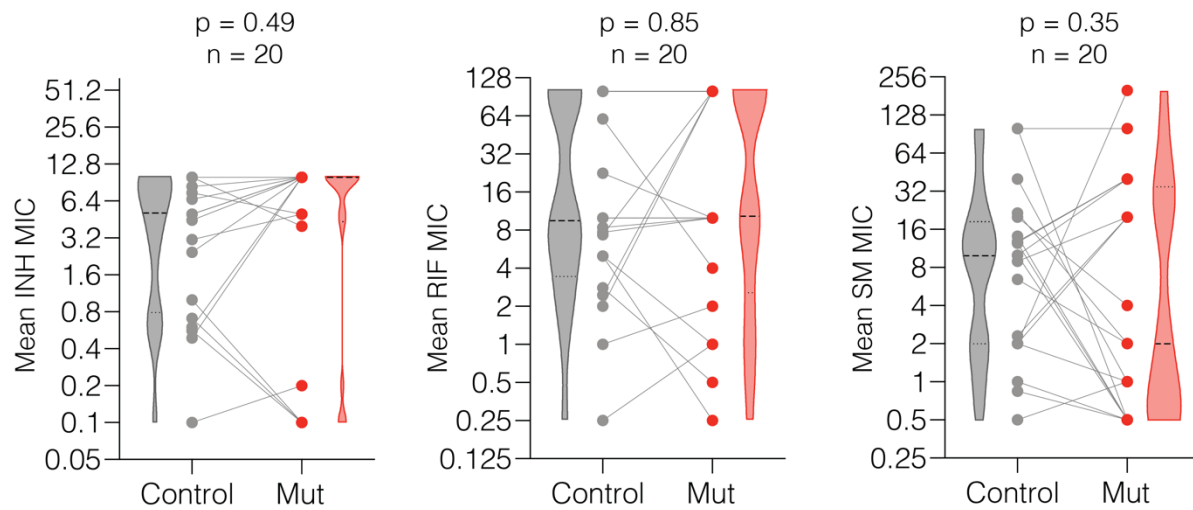

**Figure S12. Comparison of the mean MIC of phylogenetic clades bearing any *Rv0010c-Rv0011c* mutation (red dots) with their nearest non-mutant neighbors (gray dots).** Dashed line represents the median of the dataset. Gray lines between dots indicate each independent phylogenetic contrast. Difference in distribution tested by two-tailed Wilcoxon matched-pairs signed rank test.
